# Supplementary material for: The bradykinin system in stress and anxiety in humans and mice
Source: PubMed Central journal article supplement (PMC6923437; doi:10.1038/s41598-019-55947-5), 2019-12-19
Supplement: 41598_2019_55947_MOESM1_ESM.pdf [file 41598_2019_55947_MOESM1_ESM.pdf]

## **The bradykinin system in stress and anxiety in humans and mice**

Ari Rouhiainen<sup>1,\*</sup>, Natalia Kuleskaya<sup>1,\*</sup>, Marie Mennesson<sup>1, 2, 3, 4</sup>, Zuzanna Misiewicz<sup>1, 2</sup>, Tessa Sipilä<sup>1</sup>, Ewa Sokolowska<sup>1</sup>, Kalevi Trontti<sup>1, 2, 3, 4</sup>, Lea Urpa<sup>1</sup>, William McEntegart<sup>1</sup>, Suvi Saarnio<sup>1</sup>, Petri Hyytiä<sup>5</sup>, Iiris Hovatta<sup>1, 2, 3, 4</sup>

<sup>1</sup> Molecular and Integrative Biosciences Research Program, University of Helsinki, Helsinki, Finland

<sup>2</sup> Department of Psychology and Logopedics, Medicum, University of Helsinki, Helsinki, Finland

<sup>3</sup> SleepWell Research Program, Faculty of Medicine, University of Helsinki, Finland

<sup>4</sup> Neuroscience Center, Helsinki Institute of Life Science HiLIFE, University of Helsinki, Finland

<sup>5</sup> Department of Pharmacology, Medicum, University of Helsinki, Helsinki, Finland

### **Supplemental information:**

Supplementary Table 1

Supplementary Figure 1

**Supplemental Table 1.** Genotyped SNPs. The SNP was not analyzed for association if it failed quality control.

| <b>Gene</b> | <b>SNP</b>        | <b>Reason for failing quality control</b> |
|-------------|-------------------|-------------------------------------------|
| BDKRB1      | rs4905475         |                                           |
|             | rs10134118        | Not in Hardy-Weinberg equilibrium         |
|             | rs11622768        |                                           |
|             | rs10147171        |                                           |
|             | rs10137303        |                                           |
|             | rs11628515        |                                           |
|             | rs10143977        | Genotyping failed                         |
|             | rs2081084         | Genotyping failed                         |
|             | rs10142830        |                                           |
|             | rs885845          |                                           |
|             | rs8010789         |                                           |
|             | rs945036          |                                           |
|             | rs4349080         |                                           |
|             | rs4905476         |                                           |
|             | rs11160324        | Genotyping failed                         |
|             | rs7147284         |                                           |
|             | rs11621078        |                                           |
| rs1959049   |                   |                                           |
| rs945034    |                   |                                           |
| rs2369523   |                   |                                           |
| rs2069613   |                   |                                           |
| BDKRB2      | rs945032          |                                           |
|             | rs8016905         |                                           |
|             | rs1046248         |                                           |
|             | rs4900312         |                                           |
|             | rs4900313         |                                           |
|             | rs945039          |                                           |
|             | rs4905467         |                                           |
|             | rs11847625        | Genotyping failed                         |
|             | rs8013400         |                                           |
|             | rs8012552         |                                           |
|             | rs4905470         |                                           |
|             | rs7149163         |                                           |
|             | rs2069575         |                                           |
|             | rs2069578         |                                           |
|             | rs5225            |                                           |
|             | rs2069590         | Genotyping failed                         |
|             | rs2069596         |                                           |
| rs2069599   | Genotyping failed |                                           |
| rs4900311   |                   |                                           |
| rs11160319  |                   |                                           |
| rs11625405  |                   |                                           |
| rs1799722   |                   |                                           |
| rs1959053   |                   |                                           |
| rs12433275  | Genotyping failed |                                           |
| rs7624355   | Genotyping failed |                                           |
| KNG1        | rs13315296        |                                           |
|             | rs11918289        |                                           |
|             | rs11924390        |                                           |
|             | rs1624230         |                                           |
|             | rs1621816         |                                           |
|             | rs1469859         |                                           |
|             | rs1656922         |                                           |
|             | rs2304456         |                                           |
|             | rs5030028         |                                           |
|             | rs5030102         |                                           |
|             | rs266723          |                                           |
|             | rs5030039         |                                           |
|             | rs1624569         |                                           |
|             | rs5030060         |                                           |
|             | rs710446          |                                           |
|             | rs5030091         |                                           |
|             | rs266760          |                                           |
| rs266763    |                   |                                           |
| rs1972703   |                   |                                           |
| rs266764    |                   |                                           |
| rs6796803   |                   |                                           |

**Supplemental Figure 1:** Uncropped Western blots of Figure 2.

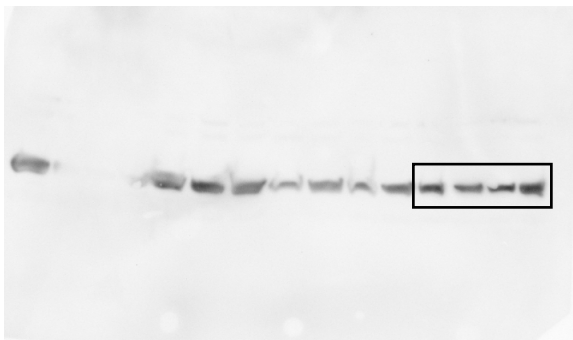

Fig. 2a BDKRB2

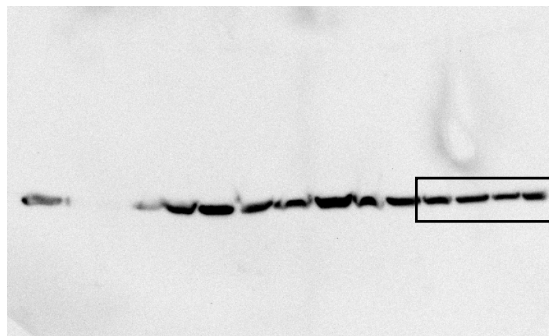

Fig. 2a Actin

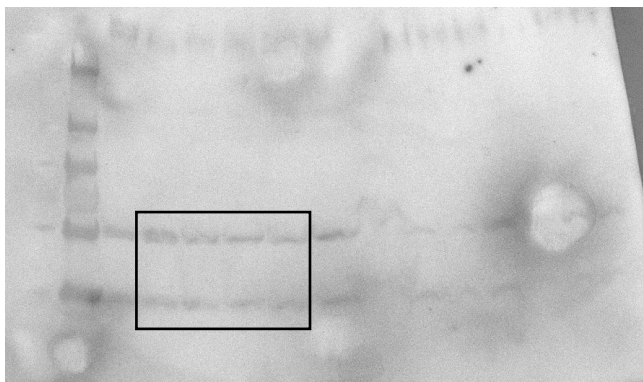

Fig. 2b BDKRB1

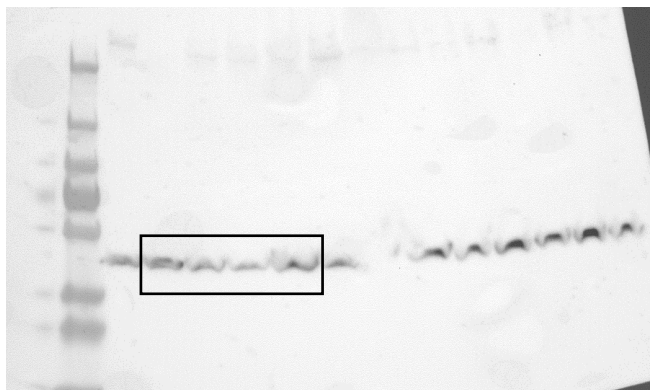

Fig. 2b Actin

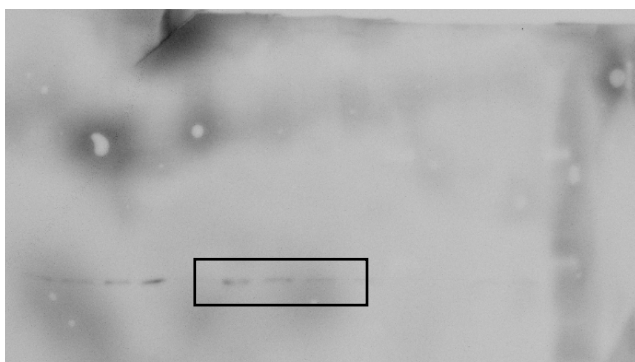

Fig. 2c CRYAB

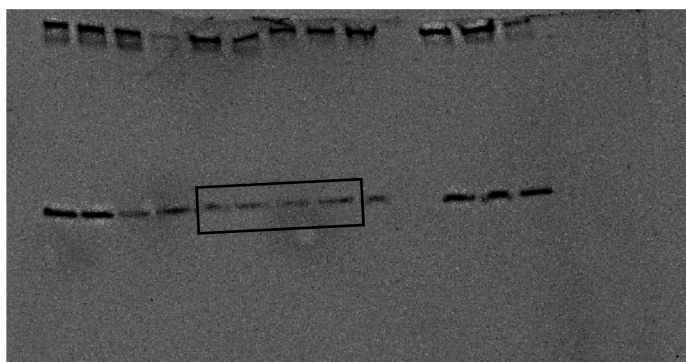

Fig. 2c Actin

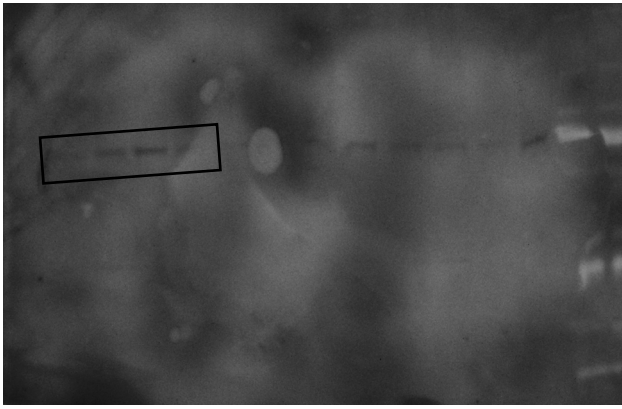

Fig. 2d cFOS

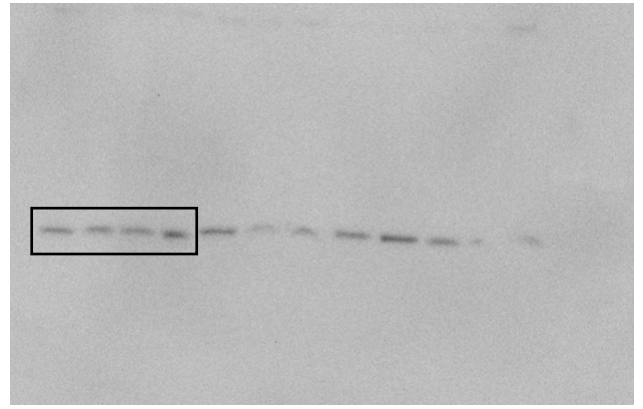

Fig. 2d Actin

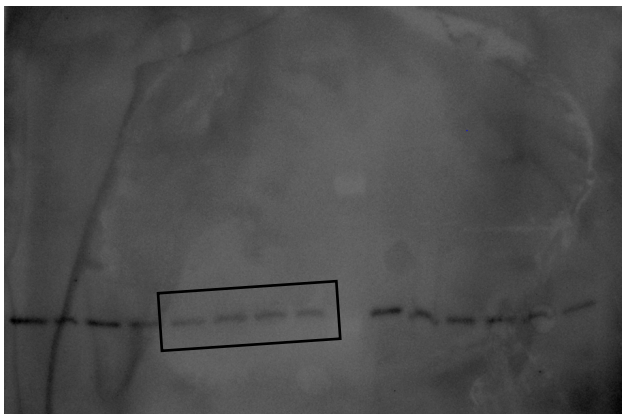

Fig. 2e HMGB1

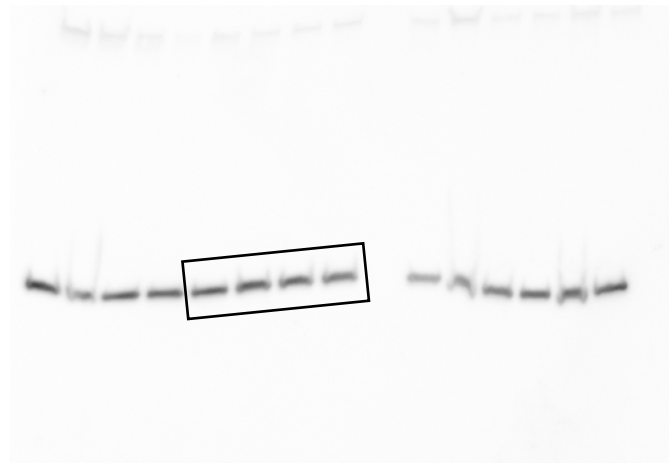

Fig. 2e Actin
